# Supplementary material for: Interference-free analysis of aflatoxin B1and G1in various foodstuffs using trilinear component modeling of excitation–emission matrix fluorescence data enhanced through photochemical derivatization
Source: Royal Society of Chemistry journal article supplement (doi:10.1039/c5ra26549e), 2016-01-01
Supplement: c5ra26549e1.pdf [file c5ra26549e1.pdf]

**Interference-free analysis of aflatoxin B<sub>1</sub> and G<sub>1</sub> in various foodstuffs  
using trilinear component modeling of excitation-emission matrix  
fluorescence data enhanced through photochemical derivatization**

Zhi Liu, Hai-Long Wu,\* Hui-Wen Gu, Xiao-Li Yin, Li-Xia Xie, Yong Hu, Hui Xia,  
Shou-Xia Xiang, Ru-Qin Yu\*

*State Key Laboratory of Chemo/Biosensing and Chemometrics, College of Chemistry  
and Chemical Engineering, Hunan University, Changsha 410082, China*

*\* Corresponding author*

Hai-Long Wu

State Key Laboratory of Chemo/Biosensing and Chemometrics, College of Chemistry  
and Chemical Engineering, Hunan University, Changsha 410082, China

Tel./Fax: (+86) 731 88821818;

E-mail: [hlwu@hnu.edu.cn](mailto:hlwu@hnu.edu.cn)

**The following pages are the original SIM quantitative reports exported from the  
Agilent MassHunter quantitative analysis software (version B.04.00)**

(1) Quantitative Analysis Calibration Report

(2) Quantitative Analysis Summary Report

# Quantitative Analysis Calibration Report

## Batch Info

|                   |                                                                |               |               |
|-------------------|----------------------------------------------------------------|---------------|---------------|
| Batch Data Path   | D:\MassHunter\Data\LZ\20150204\QuantResults\20120204.batch.bin |               |               |
| Analysis Time     | 2/5/2015 2:12 PM                                               | Analyst Name  | Administrator |
| Report Time       | 2/5/2015 2:16 PM                                               | Reporter Name | Administrator |
| Last Calib Update | 2/5/2015 2:12 PM                                               | Batch State   | Processed     |

## Calibration Info

Target Compound *AFG1*

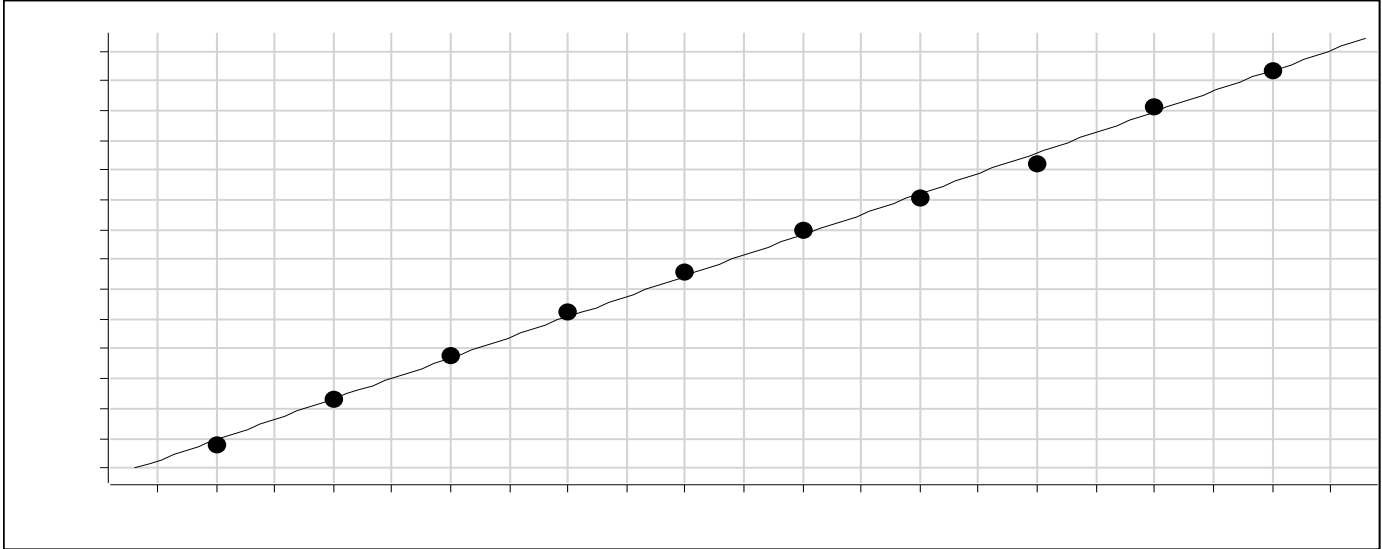

### Calibration STD

| Cal Type    | Level | Enabled                             | Response | Exp Conc | RF       |
|-------------|-------|-------------------------------------|----------|----------|----------|
| Calibration | L1    | <input checked="" type="checkbox"/> | 1525     | 2.0000   | 762.4780 |
| Calibration | L10   | <input checked="" type="checkbox"/> | 26703    | 38.0000  | 702.7125 |
| Calibration | L2    | <input checked="" type="checkbox"/> | 4585     | 6.0000   | 764.1510 |
| Calibration | L3    | <input checked="" type="checkbox"/> | 7580     | 10.0000  | 757.9663 |
| Calibration | L4    | <input checked="" type="checkbox"/> | 10427    | 14.0000  | 744.8138 |
| Calibration | L5    | <input checked="" type="checkbox"/> | 13157    | 18.0000  | 730.9602 |
| Calibration | L6    | <input checked="" type="checkbox"/> | 15924    | 22.0000  | 723.8216 |
| Calibration | L7    | <input checked="" type="checkbox"/> | 18154    | 26.0000  | 698.2424 |
| Calibration | L8    | <input checked="" type="checkbox"/> | 20439    | 30.0000  | 681.3008 |
| Calibration | L9    | <input checked="" type="checkbox"/> | 24243    | 34.0000  | 713.0232 |

Target Compound *AFB1*

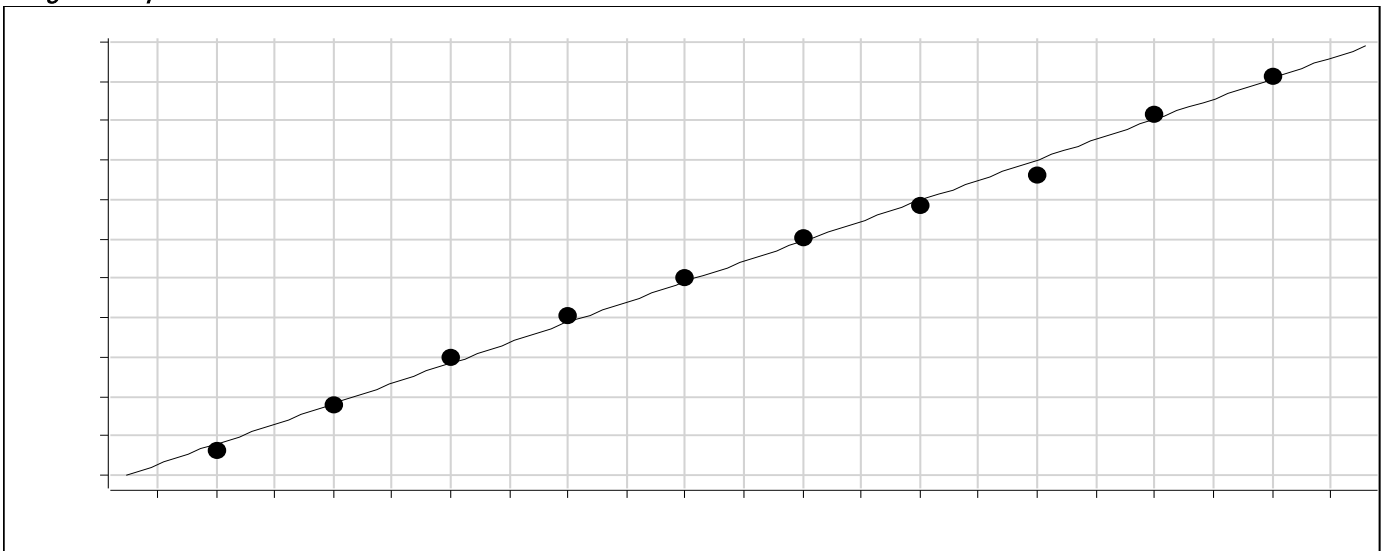

### Calibration STD

| Cal Type    | Level | Enabled                             | Response | Exp Conc | RF        |
|-------------|-------|-------------------------------------|----------|----------|-----------|
| Calibration | L1    | <input checked="" type="checkbox"/> | 3110     | 2.0000   | 1555.2176 |
| Calibration | L10   | <input checked="" type="checkbox"/> | 50665    | 38.0000  | 1333.2985 |
| Calibration | L2    | <input checked="" type="checkbox"/> | 8953     | 6.0000   | 1492.1587 |
| Calibration | L3    | <input checked="" type="checkbox"/> | 14865    | 10.0000  | 1486.5253 |

# Quantitative Analysis Calibration Report

| Calibration STD | Cal Type    | Level | Enabled                             | Response | Exp Conc | RF        |
|-----------------|-------------|-------|-------------------------------------|----------|----------|-----------|
| CAL04.d         | Calibration | L4    | <input checked="" type="checkbox"/> | 20188    | 14.0000  | 1442.0197 |
| CAL05.d         | Calibration | L5    | <input checked="" type="checkbox"/> | 24962    | 18.0000  | 1386.7868 |
| CAL06.d         | Calibration | L6    | <input checked="" type="checkbox"/> | 30167    | 22.0000  | 1371.2331 |
| CAL07.d         | Calibration | L7    | <input checked="" type="checkbox"/> | 34306    | 26.0000  | 1319.4491 |
| CAL08.d         | Calibration | L8    | <input checked="" type="checkbox"/> | 38116    | 30.0000  | 1270.5386 |
| CAL09.d         | Calibration | L9    | <input checked="" type="checkbox"/> | 45868    | 34.0000  | 1349.0724 |

# Quantitative Analysis Summary Report

## Batch Info

|                          |                                                                |                      |               |
|--------------------------|----------------------------------------------------------------|----------------------|---------------|
| <b>Batch Data Path</b>   | D:\MassHunter\Data\LZ\20150204\QuantResults\20120204.batch.bin |                      |               |
| <b>Analysis Time</b>     | 2/5/2015 2:12 PM                                               | <b>Analyst Name</b>  | Administrator |
| <b>Report Time</b>       | 2/5/2015 2:16 PM                                               | <b>Reporter Name</b> | Administrator |
| <b>Last Calib Update</b> | 2/5/2015 2:12 PM                                               | <b>Batch State</b>   | Processed     |

## Sequence Table

| Data File | Sample Name | Position | Volume | Level | Sample Type | Acq Method File |
|-----------|-------------|----------|--------|-------|-------------|-----------------|
| CAL01.d   | Sample1     | P1-A1    | -1     | L1    | Calibration | AFT20150202.m   |
| CAL02.d   | Sample2     | P1-A2    | -1     | L2    | Calibration | AFT20150202.m   |
| CAL03.d   | Sample3     | P1-A3    | -1     | L3    | Calibration | AFT20150202.m   |
| CAL04.d   | Sample4     | P1-A4    | -1     | L4    | Calibration | AFT20150202.m   |
| CAL05.d   | Sample5     | P1-A5    | -1     | L5    | Calibration | AFT20150202.m   |
| CAL06.d   | Sample6     | P1-A6    | -1     | L6    | Calibration | AFT20150202.m   |
| CAL07.d   | Sample7     | P1-A7    | -1     | L7    | Calibration | AFT20150202.m   |
| CAL08.d   | Sample8     | P1-A8    | -1     | L8    | Calibration | AFT20150202.m   |
| CAL09.d   | Sample9     | P1-A9    | -1     | L9    | Calibration | AFT20150202.m   |
| CAL10.d   | Sample10    | P1-B1    | -1     | L10   | Calibration | AFT20150202.m   |
| YM01.d    | Sample15    | P1-B6    | -1     |       | Sample      | AFT20150202.m   |
| YM02.d    | Sample16    | P1-B7    | -1     |       | Sample      | AFT20150202.m   |
| YM03.d    | Sample17    | P1-B8    | -1     |       | Sample      | AFT20150202.m   |
| MF01.d    | Sample18    | P1-B9    | -1     |       | Sample      | AFT20150202.m   |
| MF02.d    | Sample19    | P1-C1    | -1     |       | Sample      | AFT20150202.m   |
| MF03.d    | Sample20    | P1-C2    | -1     |       | Sample      | AFT20150202.m   |
| FM01.d    | Sample21    | P1-C3    | -1     |       | Sample      | AFT20150202.m   |
| FM02.d    | Sample22    | P1-C4    | -1     |       | Sample      | AFT20150202.m   |
| FM03.d    | Sample23    | P1-C5    | -1     |       | Sample      | AFT20150202.m   |
| DY01.d    | Sample24    | P1-C6    | -1     |       | Sample      | AFT20150202.m   |
| DY02.d    | Sample25    | P1-C7    | -1     |       | Sample      | AFT20150202.m   |
| DY03.d    | Sample26    | P1-C8    | -1     |       | Sample      | AFT20150202.m   |

## Quantitation Results

AFG1

| Data File | Compound | Sample Type | RT    | Response | Final Conc | Exp Conc | Accuracy |
|-----------|----------|-------------|-------|----------|------------|----------|----------|
| CAL01.d   | AFG1     | Calibration | 4.100 | 1525     | 1.4850     | 2.0000   | 74.25    |
| CAL02.d   | AFG1     | Calibration | 4.100 | 4585     | 5.9289     | 6.0000   | 98.82    |
| CAL03.d   | AFG1     | Calibration | 4.090 | 7580     | 10.2782    | 10.0000  | 102.78   |
| CAL04.d   | AFG1     | Calibration | 4.090 | 10427    | 14.4140    | 14.0000  | 102.96   |
| CAL05.d   | AFG1     | Calibration | 4.080 | 13157    | 18.3786    | 18.0000  | 102.10   |
| CAL06.d   | AFG1     | Calibration | 4.080 | 15924    | 22.3968    | 22.0000  | 101.80   |
| CAL07.d   | AFG1     | Calibration | 4.080 | 18154    | 25.6357    | 26.0000  | 98.60    |

# Quantitative Analysis Summary Report

| Data File | Compound | Sample Type | RT    | Response | Final Conc | Exp Conc | Accuracy |
|-----------|----------|-------------|-------|----------|------------|----------|----------|
| CAL08.d   | AFG1     | Calibration | 4.070 | 20439    | 28.9538    | 30.0000  | 96.51    |
| CAL09.d   | AFG1     | Calibration | 4.060 | 24243    | 34.4780    | 34.0000  | 101.41   |
| CAL10.d   | AFG1     | Calibration | 4.070 | 26703    | 38.0511    | 38.0000  | 100.13   |
| YM01.d    | AFG1     | Sample      | 4.070 | 458      | 0.0000     |          |          |
| YM02.d    | AFG1     | Sample      | 4.070 | 6121     | 8.1596     |          |          |
| YM03.d    | AFG1     | Sample      | 4.070 | 9926     | 13.6855    |          |          |
| MF01.d    | AFG1     | Sample      | 4.050 | 439      | 0.0000     |          |          |
| MF02.d    | AFG1     | Sample      | 4.080 | 2558     | 2.9857     |          |          |
| MF03.d    | AFG1     | Sample      | 4.080 | 3705     | 4.6504     |          |          |
| FM01.d    | AFG1     | Sample      | 3.382 | 131      | 0.0000     |          |          |
| FM02.d    | AFG1     | Sample      | 3.291 | 98       | 0.0000     |          |          |
| FM03.d    | AFG1     | Sample      | 3.291 | 151      | 0.0000     |          |          |
| DY01.d    | AFG1     | Sample      | 4.698 | 983      | 0.6979     |          |          |
| DY02.d    | AFG1     | Sample      | 4.080 | 1668     | 1.6927     |          |          |
| DY03.d    | AFG1     | Sample      | 4.090 | 2413     | 2.7750     |          |          |

## *AFB1*

| Data File | Compound | Sample Type | RT    | Response | Final Conc | Exp Conc | Accuracy |
|-----------|----------|-------------|-------|----------|------------|----------|----------|
| CAL01.d   | AFB1     | Calibration | 4.754 | 3110     | 1.3618     | 2.0000   | 68.09    |
| CAL02.d   | AFB1     | Calibration | 4.754 | 8953     | 5.8972     | 6.0000   | 98.29    |
| CAL03.d   | AFB1     | Calibration | 4.743 | 14865    | 10.4868    | 10.0000  | 104.87   |
| CAL04.d   | AFB1     | Calibration | 4.743 | 20188    | 14.6189    | 14.0000  | 104.42   |
| CAL05.d   | AFB1     | Calibration | 4.733 | 24962    | 18.3248    | 18.0000  | 101.80   |
| CAL06.d   | AFB1     | Calibration | 4.733 | 30167    | 22.3653    | 22.0000  | 101.66   |
| CAL07.d   | AFB1     | Calibration | 4.723 | 34306    | 25.5779    | 26.0000  | 98.38    |
| CAL08.d   | AFB1     | Calibration | 4.723 | 38116    | 28.5359    | 30.0000  | 95.12    |
| CAL09.d   | AFB1     | Calibration | 4.713 | 45868    | 34.5538    | 34.0000  | 101.63   |
| CAL10.d   | AFB1     | Calibration | 4.723 | 50665    | 38.2775    | 38.0000  | 100.73   |
| YM01.d    | AFB1     | Sample      | 5.078 | 223      | 0.0000     |          |          |
| YM02.d    | AFB1     | Sample      | 4.723 | 5567     | 3.2685     |          |          |
| YM03.d    | AFB1     | Sample      | 4.733 | 12243    | 8.4513     |          |          |
| MF01.d    | AFB1     | Sample      | 5.027 | 125      | 0.0000     |          |          |
| MF02.d    | AFB1     | Sample      | 4.733 | 3584     | 1.7291     |          |          |
| MF03.d    | AFB1     | Sample      | 4.723 | 9929     | 6.6549     |          |          |
| FM01.d    | AFB1     | Sample      | 5.007 | 327      | 0.0000     |          |          |
| FM02.d    | AFB1     | Sample      | 4.754 | 122      | 0.0000     |          |          |
| FM03.d    | AFB1     | Sample      | 4.764 | 179      | 0.0000     |          |          |
| DY01.d    | AFB1     | Sample      | 4.855 | 148      | 0.0000     |          |          |
| DY02.d    | AFB1     | Sample      | 4.733 | 3472     | 1.6424     |          |          |
| DY03.d    | AFB1     | Sample      | 4.733 | 4800     | 2.6735     |          |          |
